# Supplementary material for: ClimarisQ: What can we learn by playing a serious game for climate education?
Source: Copernicus journal article supplement (doi:10.5194/egusphere-2025-2222), 2025-08-19
Supplement: Supplementary file 1 [file egusphere-2025-2222-supplement.pdf]

# ClimarisQ Survey

This form is here to help us conduct studies on games as a science mediation tool. Answering this questionnaire would help us a lot!

## General Information

1. How old are you? \*
2. How do you identify yourself? \*
  - Man
  - Woman
  - Non-binary
  - Prefer not to say
  - Other:
3. What is your education level? \*
  - High School
  - College or University License
  - University Master or Equivalent
  - PhD or Equivalent
  - Other:
4. In which field do you work? \*
  - Student
  - Salaried executive
  - Employed
  - Worker
  - Head of a company
  - Retired
  - Other:
5. Where are you from? \*
  - France
  - Italy
  - Spain
  - England
  - Germany
  - Outside the European Union (specify below)
  - Rest of the world (specify below)
  - Other:
6. How did you discover the game? \*
  - Social networks
  - External contact
  - Website
  - Weather and Climate Forum

# ClimarisQ Survey

- By chance
- Other:

## Game Specific Questions

On a scale of 1 to 5, how would you rate the ergonomics (ease of use) of ClimarisQ? \*

Poor ergonomics (1) 2 3 4 5 (Very good ergonomics)

On a scale of 1 to 5, how would you rate the scientific content of the ClimarisQ game? \*

Poor scientific content (1) 2 3 4 5 (Very good scientific content)

On a scale of 1 to 5, how would you rate the questions of the ClimarisQ game (ease of understanding)? \*

Bad understanding (1) 2 3 4 5 (Very good understanding)

On a scale of 1 to 5, how would you rate the difficulty of the ClimarisQ game? \*

Easy game (1) 2 3 4 5 (Hard game)

On a scale of 1 to 5, how would you rate the aesthetics (graphics, colors, characters...) of ClimarisQ? \*

Not a very nice game (1) 2 3 4 5 (Very nice game)

## Impact of the ClimarisQ Game

Did the ClimarisQ game teach you anything about climate change? \*

- Yes
- No

If so, what?

Will the ClimarisQ game have an impact on your everyday life? \*

- Yes
- No

If so, in which aspect(s)?

Would you recommend the ClimarisQ game to someone? \*

- Yes
- No

If so, why?

## Acknowledgements

**Thank you very much for answering our questionnaire, it will help us a lot in our further analysis and research!**
